# Supplementary material
Source: ML conference proceedings conference paper supplement (https://proceedings.mlr.press/v180/fathullah22a.html)
Supplement: Supplementary file [file fathullah22a-supp.pdf]

---

# Self-Distribution Distillation: Efficient Uncertainty Estimation (Supplementary material)

---

Yassir Fathullah<sup>1</sup>

Mark J. F. Gales<sup>1</sup>

<sup>1</sup>Engineering Department, University of Cambridge, UK

## A EXPERIMENTAL CONFIGURATION

Table 1: Description of datasets used in training and evaluating models.

| Dataset       | Train | Test  | Classes |
|---------------|-------|-------|---------|
| CIFAR-100     | 50000 | 10000 | 100     |
| LSUN          | -     | 10000 | 10      |
| SVHN          | -     | 26032 | 10      |
| Tiny ImageNet | -     | 10000 | 200     |

All models were trained on the CIFAR-100 dataset, with and without data augmentation. The augmentation scheme involves randomly mirroring and shifting images following He et al. [2016], Huang et al. [2016]. Remaining datasets were used as out-of-distribution samples in the detection task.

All individual models, and ensemble members were based off the DenseNet-BC ( $k = 12$ , 100 layers) architecture and trained according to Huang et al. [2017]. SWAG-Diag was obtained by checkpointing the weights of the last 20 epochs with a reduced learning rate of  $\eta = 1.0 \times 10^{-4}$ . MIMO with two output heads was trained using the same setup as for the standard model. To keep training costs comparable to (S2D) individual models, no batch or input repetition was used [Havasi et al., 2021]. Similarly all self-distribution distilled equivalents were trained with identical training recipes with the addition of a student loss ( $\mu = 1.28 \times 10^{-4}$ ).

Regarding distilled based models, the EnD baseline was trained using negative log-likelihood using the average temperature scaled prediction of the teacher ensemble, with  $T \in \{1.0, 2.0, 3.0, 4.0, 5.0\}$ . For the hierarchical distribution distillation approaches the students were first initialised with the weights of an S2D model trained for 150 epochs, for increased stability. Thereafter, each student was trained using the appropriate H2D criteria with a significantly reduced learning rate. H2D-Dir was trained using  $\eta = 5.0 \times 10^{-5}$  for an additional 150 epochs. H2D-Gauss required an initial learning rate of  $\eta = 5.0 \times 10^{-3}$  which was reduced by a factor of 2 after 75 and 150 epochs. It was trained for 170 epochs. Additionally, uncertainties were computed by generating 50 samples from each Gaussian prediction, since this modelling choice does not result in closed form expressions.

### A.1 PROXY TARGET TRAINING

Since the use of negative log-likelihood can be unstable in training S2D and distilling H2D models we utilise proxy targets and KL-divergence. It has already been mentioned that the proxy target in S2D follows:

$$\tilde{\alpha} = \arg \max_{\hat{\alpha}} \sum_m \ln \text{Dir}(\boldsymbol{\pi}^{(m)}; \hat{\alpha}), \quad \boldsymbol{\pi}^{(m)} = \text{Softmax}(\mathbf{z}^{(m)}, T) \quad (1)$$

Each categorical prediction will be temperature scaled, with  $T = 1.5$ , to mitigate overconfident predictions. While H2D-Dir does not require any proxy targets, the Gaussian equivalent does. The proxy diagonal Gaussian, estimated according to maximum log-likelihood, has a closed-form expression:

$$\tilde{\boldsymbol{\mu}} = \frac{1}{M} \sum_{m=1}^M \ln \boldsymbol{\alpha}^{(m)}, \quad \tilde{\boldsymbol{\sigma}}^2 = \frac{1}{M} \sum_{m=1}^M (\ln \boldsymbol{\alpha}^{(m)} - \tilde{\boldsymbol{\mu}})^2 \quad (2)$$

where  $\mathbf{v}^2 = \mathbf{v} \odot \mathbf{v}$  represents an element-wise multiplication. This is then used in a KL-divergence based loss, training the student with prediction  $\boldsymbol{\mu}$ ,  $\boldsymbol{\sigma}$  according to:

$$\text{KL}(\mathcal{N}(\mathbf{z}; \tilde{\boldsymbol{\mu}}, \tilde{\boldsymbol{\sigma}}^2) \parallel \mathcal{N}(\mathbf{z}; \boldsymbol{\mu}, \boldsymbol{\sigma}^2)) = \sum_{c=1}^K \ln \left( \frac{\sigma_c}{\tilde{\sigma}_c} \right) + \frac{\tilde{\sigma}_c^2 + (\mu_c - \tilde{\mu}_c)^2}{2\sigma_c^2} - \frac{1}{2} \quad (3)$$

Note however, that the proxy targets are detached from any back gradient propagation calculations. This is to simulate typical teacher-student knowledge transfer where teacher weights are kept fixed during student training.

## B OUT-OF-DISTRIBUTION DETECTION

This section covers remaining out-of-distribution detection experiments. First, we cover the LSUN and Tiny ImageNet detection problem for all models considered in section 5.2. Thereafter, additional experiments will be run on ensembles of various sizes. This is to investigate if the low quality of knowledge uncertainty estimates is caused by a limited number of ensemble members.

### B.1 TINY IMAGENET EXPERIMENTS

Similar to the results section 5.2 the S2D Deep ensemble and H2D-Gauss outperformed all other models, see Table 3 and 4. The only exception is the use of confidence on resized TIM with the AUROC metric where the Deep ensemble marginally outperforms the S2D equivalent. However, unlike previous results, knowledge uncertainty seems to perform on par with or outperform confidence. The one exception is the MC ensemble.

Table 2: OOD detection results (LSUN random crop) trained on C100. **Best** in column and **best** overall.

| Model             | OOD %AUROC     |                |                |                | OOD %AUPR      |                |                |                 |
|-------------------|----------------|----------------|----------------|----------------|----------------|----------------|----------------|-----------------|
|                   | Conf.          | TU             | DU             | KU             | Conf.          | TU             | DU             | KU              |
| Individual        | 83.2 $\pm$ 2.1 | 85.7 $\pm$ 4.5 |                |                | 79.4 $\pm$ 5.6 | 83.0 $\pm$ 5.9 |                |                 |
| S2D Individual    | 85.4 $\pm$ 4.5 | 88.9 $\pm$ 4.1 | 90.3 $\pm$ 4.0 | 84.1 $\pm$ 4.8 | 81.9 $\pm$ 6.2 | 86.6 $\pm$ 5.7 | 90.3 $\pm$ 5.0 | 76.0 $\pm$ 5.1  |
| MIMO              | 83.3 $\pm$ 3.9 | 86.2 $\pm$ 4.2 | 86.3 $\pm$ 4.3 | 80.9 $\pm$ 1.6 | 79.6 $\pm$ 6.6 | 83.8 $\pm$ 6.8 | 83.8 $\pm$ 6.9 | 72.4 $\pm$ 3.7  |
| S2D MIMO          | 85.8 $\pm$ 2.5 | 89.5 $\pm$ 2.8 | 90.7 $\pm$ 2.8 | 85.5 $\pm$ 2.8 | 78.0 $\pm$ 3.4 | 84.8 $\pm$ 3.5 | 89.4 $\pm$ 3.4 | 75.2 $\pm$ 3.3  |
| SWAG-Diag         | 84.3 $\pm$ 2.8 | 87.1 $\pm$ 3.1 | 87.1 $\pm$ 3.1 | 80.8 $\pm$ 7.2 | 80.8 $\pm$ 4.0 | 84.5 $\pm$ 3.8 | 84.6 $\pm$ 3.8 | 73.4 $\pm$ 14.2 |
| S2D SWAG-Diag     | 85.6 $\pm$ 2.7 | 89.1 $\pm$ 2.5 | 90.4 $\pm$ 2.5 | 85.3 $\pm$ 3.0 | 81.8 $\pm$ 4.0 | 86.5 $\pm$ 3.6 | 90.2 $\pm$ 3.4 | 76.4 $\pm$ 3.6  |
| MC ensemble       | 81.0 $\pm$ 3.5 | 84.4 $\pm$ 4.0 | 86.4 $\pm$ 3.8 | 63.0 $\pm$ 4.0 | 77.0 $\pm$ 3.6 | 81.7 $\pm$ 4.0 | 84.9 $\pm$ 4.0 | 53.1 $\pm$ 3.1  |
| S2D MC ensemble   | 83.3 $\pm$ 2.3 | 86.9 $\pm$ 3.2 | 90.0 $\pm$ 2.5 | 77.7 $\pm$ 5.3 | 79.3 $\pm$ 3.2 | 83.8 $\pm$ 4.3 | 90.1 $\pm$ 3.2 | 69.8 $\pm$ 4.8  |
| Deep ensemble     | 85.9           | 89.1           | 90.9           | 80.4           | 82.0           | 86.3           | 89.1           | 72.5            |
| S2D Deep ensemble | 86.8           | 90.5           | 93.7           | 81.5           | <b>83.0</b>    | 87.9           | 93.9           | 73.4            |
| EnD               | 84.7           | 87.4           |                |                | 81.1           | 84.9           |                |                 |
| H2D-Dir           | 85.3           | 88.9           | 88.8           | <b>91.7</b>    | 82.5           | 87.4           | 87.6           | <b>87.1</b>     |
| H2D-Gauss         | <b>86.9</b>    | <b>90.6</b>    | <b>95.1</b>    | 76.0           | 82.9           | <b>88.0</b>    | <b>95.7</b>    | 67.0            |

Table 3: OOD detection results (TIM resize) trained on C100. **Best** in column and **best** overall.

|                   |                |                |                |                |                |                |                |                |
|-------------------|----------------|----------------|----------------|----------------|----------------|----------------|----------------|----------------|
| Individual        | 77.6 $\pm$ 0.7 | 79.5 $\pm$ 0.7 |                |                | 74.2 $\pm$ 0.7 | 77.1 $\pm$ 0.9 |                |                |
| S2D Individual    | 78.0 $\pm$ 0.8 | 80.1 $\pm$ 0.7 | 79.6 $\pm$ 0.8 | 78.1 $\pm$ 0.4 | 75.3 $\pm$ 0.9 | 77.7 $\pm$ 0.9 | 76.6 $\pm$ 1.2 | 76.3 $\pm$ 0.5 |
| MIMO              | 78.1 $\pm$ 0.4 | 79.9 $\pm$ 0.7 | 79.9 $\pm$ 0.8 | 76.3 $\pm$ 1.5 | 74.6 $\pm$ 1.0 | 77.3 $\pm$ 1.3 | 77.4 $\pm$ 1.3 | 69.6 $\pm$ 2.0 |
| S2D MIMO          | 80.1 $\pm$ 1.2 | 80.7 $\pm$ 1.2 | 80.7 $\pm$ 1.2 | 80.4 $\pm$ 1.2 | 77.3 $\pm$ 1.6 | 77.8 $\pm$ 1.6 | 77.7 $\pm$ 1.5 | 77.5 $\pm$ 1.6 |
| SWAG-Diag         | 77.7 $\pm$ 0.7 | 79.6 $\pm$ 0.6 | 79.6 $\pm$ 0.6 | 76.4 $\pm$ 0.7 | 74.2 $\pm$ 0.8 | 77.0 $\pm$ 0.8 | 77.1 $\pm$ 0.8 | 70.0 $\pm$ 0.7 |
| S2D SWAG-Diag     | 78.6 $\pm$ 0.7 | 80.5 $\pm$ 0.6 | 80.1 $\pm$ 0.7 | 79.2 $\pm$ 0.5 | 75.6 $\pm$ 0.9 | 78.1 $\pm$ 1.1 | 77.1 $\pm$ 1.0 | 76.5 $\pm$ 0.9 |
| MC ensemble       | 78.5 $\pm$ 0.5 | 80.6 $\pm$ 0.3 | 80.8 $\pm$ 0.4 | 76.6 $\pm$ 0.6 | 75.2 $\pm$ 0.5 | 78.1 $\pm$ 0.6 | 78.4 $\pm$ 0.5 | 70.9 $\pm$ 1.1 |
| S2D MC ensemble   | 79.3 $\pm$ 0.5 | 81.1 $\pm$ 0.5 | 81.1 $\pm$ 0.5 | 80.4 $\pm$ 0.6 | 76.4 $\pm$ 0.7 | 78.5 $\pm$ 0.8 | 78.1 $\pm$ 1.0 | 77.1 $\pm$ 0.7 |
| Deep ensemble     | <b>81.7</b>    | 83.6           | 83.5           | 81.0           | 78.9           | 81.6           | 81.5           | 76.6           |
| S2D Deep Ensemble | 81.5           | <b>84.2</b>    | 82.8           | 82.8           | <b>79.1</b>    | <b>82.0</b>    | 79.9           | 80.0           |
| EnD               | 78.7           | 80.4           |                |                | 75.4           | 78.0           |                |                |
| H2D-Dir           | 77.3           | 79.8           | 79.6           | 81.6           | 74.5           | 77.9           | 77.7           | 79.2           |
| H2D-Gauss         | 80.5           | 82.6           | <b>83.7</b>    | <b>82.8</b>    | 78.8           | 81.4           | <b>82.5</b>    | <b>80.1</b>    |

Table 4: OOD detection results (TIM random crop) trained on C100. **Best** in column and **best** overall.

|                   |                |                |                |                |                |                |                |                |
|-------------------|----------------|----------------|----------------|----------------|----------------|----------------|----------------|----------------|
| Individual        | 76.7 $\pm$ 4.1 | 79.2 $\pm$ 4.2 |                |                | 74.7 $\pm$ 3.6 | 78.5 $\pm$ 3.8 |                |                |
| S2D Individual    | 80.2 $\pm$ 5.9 | 85.4 $\pm$ 6.2 | 84.5 $\pm$ 5.9 | 86.4 $\pm$ 6.3 | 79.3 $\pm$ 6.3 | 83.3 $\pm$ 6.7 | 81.9 $\pm$ 6.6 | 83.1 $\pm$ 6.7 |
| MIMO              | 79.4 $\pm$ 4.8 | 81.9 $\pm$ 5.3 | 81.9 $\pm$ 5.3 | 79.8 $\pm$ 4.6 | 77.1 $\pm$ 4.8 | 80.9 $\pm$ 5.2 | 80.8 $\pm$ 5.3 | 74.9 $\pm$ 8.1 |
| S2D MIMO          | 80.3 $\pm$ 8.6 | 86.5 $\pm$ 8.5 | 86.5 $\pm$ 8.5 | 86.9 $\pm$ 8.6 | 80.0 $\pm$ 6.5 | 82.9 $\pm$ 6.4 | 83.0 $\pm$ 6.4 | 84.9 $\pm$ 6.5 |
| SWAG-Diag         | 78.4 $\pm$ 3.5 | 80.9 $\pm$ 3.7 | 80.9 $\pm$ 4.0 | 78.6 $\pm$ 2.0 | 76.0 $\pm$ 3.3 | 79.8 $\pm$ 3.4 | 79.7 $\pm$ 3.7 | 73.7 $\pm$ 3.5 |
| S2D SWAG-Diag     | 80.5 $\pm$ 6.0 | 84.8 $\pm$ 6.5 | 83.8 $\pm$ 6.3 | 86.6 $\pm$ 6.6 | 79.4 $\pm$ 5.5 | 83.4 $\pm$ 6.1 | 81.8 $\pm$ 6.2 | 83.4 $\pm$ 6.0 |
| MC ensemble       | 75.8 $\pm$ 4.5 | 78.8 $\pm$ 4.8 | 79.7 $\pm$ 4.9 | 69.3 $\pm$ 3.7 | 74.3 $\pm$ 4.0 | 78.5 $\pm$ 4.3 | 80.0 $\pm$ 4.3 | 60.8 $\pm$ 3.7 |
| S2D MC ensemble   | 78.8 $\pm$ 6.3 | 82.1 $\pm$ 6.4 | 82.6 $\pm$ 6.5 | 82.0 $\pm$ 6.1 | 77.1 $\pm$ 5.2 | 81.1 $\pm$ 5.1 | 81.8 $\pm$ 5.1 | 79.8 $\pm$ 4.9 |
| Deep ensemble     | 80.9           | 84.2           | 83.5           | 82.3           | 79.3           | 83.9           | 83.2           | 79.8           |
| S2D Deep ensemble | <b>84.8</b>    | <b>88.5</b>    | 86.4           | <b>89.7</b>    | <b>82.8</b>    | <b>87.3</b>    | 84.4           | <b>87.7</b>    |
| EnD               | 72.7           | 74.8           |                |                | 71.4           | 75.0           |                |                |
| H2D-Dir           | 74.7           | 78.2           | 77.9           | 84.2           | 73.2           | 77.7           | 77.5           | 81.7           |
| H2D-Gauss         | 83.2           | 88.0           | <b>88.0</b>    | 88.5           | 81.0           | 86.0           | <b>87.2</b>    | 84.1           |

## B.2 ENSEMBLE SIZE EXPERIMENTS

Knowledge uncertainty was found to have underwhelming performance (especially for MC and Deep ensembles) and did not show similar trends to prior work [Malinin and Gales, 2018, 2021, Malinin et al., 2020]. To possibly mitigate this, the ensemble size was increased as a smaller number of models could lead to inaccurate measures of diversity and knowledge uncertainty. Results are compiled in Tables 5-10.

Performance on the CIFAR-100 test set is shown in Table 5. Increasing the ensemble size leads to improved accuracy and lower negative log-likelihoods as would be expected. The MC ensemble also becomes better calibrated. The Deep ensemble on the other hand has increasing calibration error with the number of members. This is due to the ensemble prediction becoming under-confident when averaging over a large number of members.

Out-of-distribution detection performance on LSUN, SVHN and TIM are compiled in Tables 6-10. Although the MC ensemble enjoys improved accuracy when increased in size, it seems to remain relatively unaffected in terms of OOD detection using any uncertainty metric. In detecting LSUN using random crops, the performance of KU interestingly deteriorates notably. Overall this points to MC ensembles’ lacking ability in utilising new information from additional ensemble member draws/samples for better uncertainty estimation. Regarding the Deep ensemble, it generally improves with increasing size with any metric, however with diminishing returns. In this case all uncertainties improve with ensemble size, not only knowledge uncertainty. Therefore it seems that the cause for confidence, total and data outperforming knowledge uncertainty is not due to the ensemble size being limited to five members.

Table 5: Test performance of various ensembles and sizes ( $\pm 2$  std). All models are trained on C100.

| Ensemble Type | Ensemble Size (M) | Acc.           | NLL             | %ECE            |
|---------------|-------------------|----------------|-----------------|-----------------|
| MC            | 5                 | 75.6 $\pm$ 0.9 | 0.94 $\pm$ 0.04 | 6.67 $\pm$ 1.18 |
|               | 10                | 75.8 $\pm$ 0.9 | 0.92 $\pm$ 0.04 | 6.11 $\pm$ 1.11 |
|               | 20                | 76.0 $\pm$ 1.0 | 0.91 $\pm$ 0.04 | 5.81 $\pm$ 1.12 |
| Deep          | 5                 | 79.3           | 0.76            | 1.44            |
|               | 10                | 80.1           | 0.71            | 1.91            |
|               | 20                | 80.3           | 0.68            | 2.19            |

Table 6: OOD detection results (LSUN resize) trained on C100.

| Type | M  | OOD %AUROC     |                |                |                | OOD %AUPR      |                |                |                |
|------|----|----------------|----------------|----------------|----------------|----------------|----------------|----------------|----------------|
|      |    | Conf.          | TU             | DU             | KU             | Conf.          | TU             | DU             | KU             |
| MC   | 5  | 76.6 $\pm$ 0.8 | 78.3 $\pm$ 0.8 | 78.9 $\pm$ 0.8 | 72.4 $\pm$ 1.2 | 72.2 $\pm$ 1.0 | 74.6 $\pm$ 1.6 | 75.6 $\pm$ 1.7 | 64.2 $\pm$ 2.0 |
|      | 10 | 76.7 $\pm$ 0.6 | 78.3 $\pm$ 0.8 | 79.1 $\pm$ 0.9 | 72.6 $\pm$ 1.2 | 72.3 $\pm$ 1.1 | 74.6 $\pm$ 1.6 | 75.9 $\pm$ 1.7 | 64.3 $\pm$ 2.0 |
|      | 20 | 76.8 $\pm$ 0.7 | 78.4 $\pm$ 0.8 | 79.2 $\pm$ 0.8 | 72.7 $\pm$ 1.3 | 72.4 $\pm$ 1.2 | 74.6 $\pm$ 1.6 | 76.0 $\pm$ 1.7 | 64.3 $\pm$ 2.3 |
| Deep | 5  | 81.1           | 82.9           | 83.4           | 79.2           | 77.7           | 80.4           | 81.2           | 73.6           |
|      | 10 | 82.0           | 83.9           | 84.8           | 80.3           | 79.1           | 81.8           | 83.4           | 74.9           |
|      | 20 | 82.2           | 84.0           | 85.1           | 80.9           | 79.4           | 81.8           | 83.6           | 75.7           |

Table 7: OOD detection results (LSUN random crop) trained on C100.

|      |    |                |                |                |                |                |                |                |                |
|------|----|----------------|----------------|----------------|----------------|----------------|----------------|----------------|----------------|
| MC   | 5  | 81.0 $\pm$ 3.5 | 84.4 $\pm$ 4.0 | 86.4 $\pm$ 3.8 | 63.0 $\pm$ 4.0 | 77.0 $\pm$ 3.6 | 81.7 $\pm$ 4.0 | 84.9 $\pm$ 4.0 | 53.1 $\pm$ 3.1 |
|      | 10 | 81.0 $\pm$ 3.5 | 84.4 $\pm$ 3.9 | 86.7 $\pm$ 3.7 | 61.6 $\pm$ 3.9 | 77.0 $\pm$ 3.7 | 81.8 $\pm$ 4.0 | 85.4 $\pm$ 4.0 | 52.2 $\pm$ 3.0 |
|      | 20 | 80.8 $\pm$ 3.7 | 84.1 $\pm$ 4.1 | 86.6 $\pm$ 3.9 | 60.9 $\pm$ 4.0 | 76.7 $\pm$ 3.9 | 81.3 $\pm$ 4.2 | 85.3 $\pm$ 4.2 | 51.7 $\pm$ 3.0 |
| Deep | 5  | 85.9           | 89.1           | 90.9           | 80.4           | 82.0           | 86.3           | 89.1           | 72.5           |
|      | 10 | 85.7           | 89.3           | 91.3           | 81.3           | 81.8           | 86.4           | 89.9           | 73.1           |
|      | 20 | 86.2           | 89.8           | 92.2           | 82.0           | 82.1           | 86.8           | 91.0           | 73.1           |

Table 8: OOD detection results (SVHN) trained on C100.

|      |    |                |                |                |                |                |                |                |                |
|------|----|----------------|----------------|----------------|----------------|----------------|----------------|----------------|----------------|
| MC   | 5  | 79.0 $\pm$ 4.3 | 81.6 $\pm$ 4.7 | 83.1 $\pm$ 4.6 | 68.3 $\pm$ 3.0 | 88.1 $\pm$ 2.8 | 89.3 $\pm$ 3.3 | 90.7 $\pm$ 3.1 | 77.4 $\pm$ 1.8 |
|      | 10 | 78.9 $\pm$ 4.4 | 81.5 $\pm$ 4.7 | 83.3 $\pm$ 4.7 | 67.5 $\pm$ 3.1 | 88.0 $\pm$ 2.7 | 89.3 $\pm$ 3.3 | 90.9 $\pm$ 3.1 | 76.6 $\pm$ 2.0 |
|      | 20 | 78.9 $\pm$ 4.4 | 81.5 $\pm$ 4.7 | 83.3 $\pm$ 4.7 | 67.1 $\pm$ 3.3 | 88.1 $\pm$ 2.7 | 89.2 $\pm$ 3.3 | 90.9 $\pm$ 3.1 | 76.3 $\pm$ 2.0 |
| Deep | 5  | 84.5           | 87.2           | 86.8           | 85.0           | 91.3           | 92.5           | 92.2           | 91.5           |
|      | 10 | 84.1           | 87.0           | 87.5           | 83.9           | 91.2           | 92.4           | 93.1           | 90.3           |
|      | 20 | 83.7           | 86.6           | 87.2           | 84.1           | 91.0           | 92.2           | 92.9           | 90.6           |

Table 9: OOD detection results (TIM resize) trained on C100.

|      |    |                |                |                |                |                |                |                |                |
|------|----|----------------|----------------|----------------|----------------|----------------|----------------|----------------|----------------|
| MC   | 5  | 78.5 $\pm$ 0.5 | 80.6 $\pm$ 0.3 | 80.8 $\pm$ 0.4 | 76.6 $\pm$ 0.6 | 75.2 $\pm$ 0.5 | 78.1 $\pm$ 0.6 | 78.4 $\pm$ 0.5 | 70.9 $\pm$ 1.1 |
|      | 10 | 78.7 $\pm$ 0.6 | 80.8 $\pm$ 0.4 | 81.0 $\pm$ 0.5 | 77.4 $\pm$ 0.7 | 75.4 $\pm$ 0.6 | 78.4 $\pm$ 0.6 | 78.7 $\pm$ 0.5 | 72.2 $\pm$ 1.1 |
|      | 20 | 78.8 $\pm$ 0.5 | 80.9 $\pm$ 0.4 | 81.2 $\pm$ 0.4 | 77.9 $\pm$ 0.7 | 75.6 $\pm$ 0.5 | 78.4 $\pm$ 0.4 | 78.8 $\pm$ 0.4 | 72.9 $\pm$ 1.4 |
| Deep | 5  | 81.7           | 83.6           | 83.5           | 81.0           | 78.9           | 81.6           | 81.5           | 76.6           |
|      | 10 | 82.3           | 84.1           | 84.2           | 82.4           | 79.8           | 82.2           | 82.4           | 78.7           |
|      | 20 | 82.6           | 84.4           | 84.5           | 83.0           | 80.1           | 82.4           | 82.8           | 79.6           |

Table 10: OOD detection results (TIM random crop) trained on C100.

|      |    |                |                |                |                |                |                |                |                |
|------|----|----------------|----------------|----------------|----------------|----------------|----------------|----------------|----------------|
| MC   | 5  | 75.8 $\pm$ 4.5 | 78.8 $\pm$ 4.8 | 79.7 $\pm$ 4.9 | 69.3 $\pm$ 3.7 | 74.3 $\pm$ 4.0 | 78.5 $\pm$ 4.5 | 80.0 $\pm$ 4.3 | 60.8 $\pm$ 3.7 |
|      | 10 | 75.7 $\pm$ 4.8 | 78.7 $\pm$ 5.1 | 79.7 $\pm$ 5.2 | 69.1 $\pm$ 3.9 | 74.2 $\pm$ 4.2 | 78.5 $\pm$ 4.5 | 80.2 $\pm$ 4.5 | 60.7 $\pm$ 3.8 |
|      | 20 | 75.7 $\pm$ 4.7 | 78.6 $\pm$ 5.0 | 79.7 $\pm$ 5.2 | 69.0 $\pm$ 4.1 | 74.3 $\pm$ 4.1 | 78.4 $\pm$ 4.4 | 80.3 $\pm$ 4.3 | 60.6 $\pm$ 4.4 |
| Deep | 5  | 80.9           | 84.2           | 83.5           | 82.3           | 79.3           | 83.9           | 83.2           | 79.8           |
|      | 10 | 82.8           | 86.5           | 85.7           | 85.5           | 81.0           | 85.8           | 85.0           | 83.7           |
|      | 20 | 83.4           | 87.1           | 86.1           | 86.8           | 81.6           | 86.4           | 85.4           | 85.4           |

## C BEHAVIOUR OF UNCERTAINTIES

This section investigates how the uncertainties produced from a vanilla Deep ensemble differ from self-distribution distilled derived systems, and how well hierarchical distribution distillation captures the behaviour of its teacher. The comparison will be made between the in-domain CIFAR-100 and, out of simplicity, only the out-of-domain SVHN test set.

Figure 1 shows the contrast of various uncertainties between an CIFAR-100 (ID) and SVHN (OOD) test sets. Clearly, the S2D

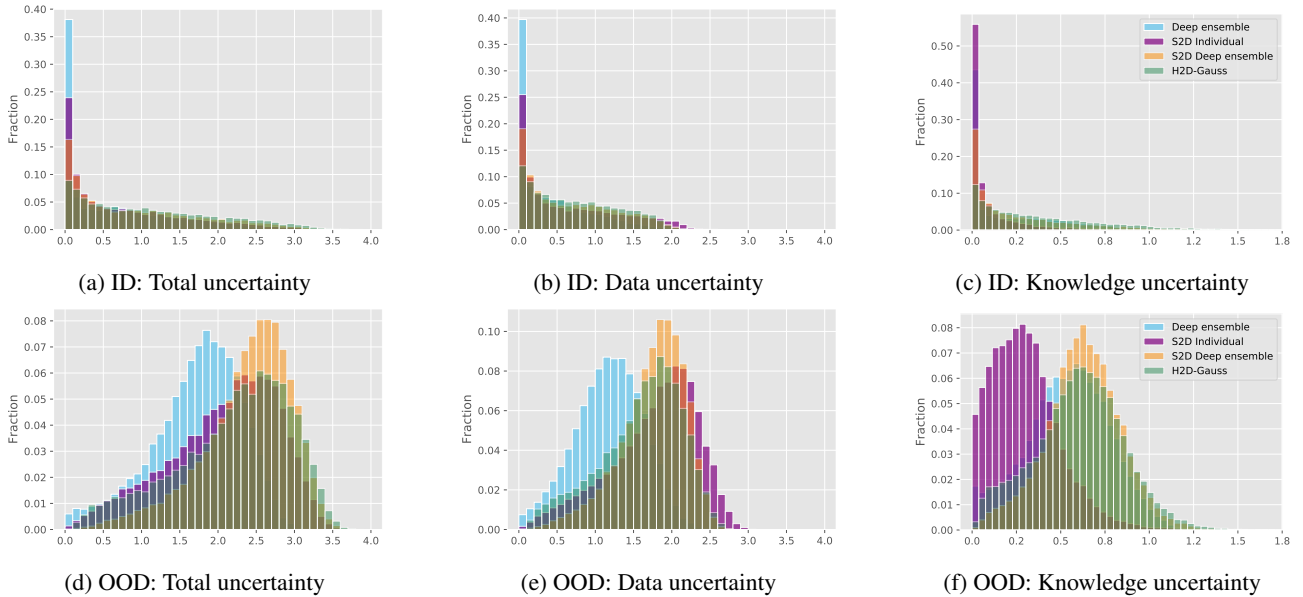

Figure 1: Histograms of various uncertainties produced by Deep ensemble, S2D, S2D Deep ensemble and H2D-Gauss systems. Out-of-distribution data was generated from the SVHN test set.

systems output ID uncertainties in a consistent manner, even matching the conceptually different Deep ensemble. Observe that S2D integrates temperature scaling (smoothing predictions) into the training of models; total and data uncertainties<sup>1</sup> estimated by these models will naturally have larger entropy than Deep ensembles. While it is expected that the Deep ensemble would have different behaviour on the SVHN OOD set, it is surprising to observe how well H2D-Gauss aligns with its S2D Deep ensemble teacher. An individual S2D model was also able to generate closely related total and data uncertainty estimates, but suffers significantly in producing consistent knowledge uncertainties. These results raise the question if a Gaussian student could capture the diversity in a vanilla Deep ensemble by modelling the logits, in a similar fashion to how H2D-Gauss models its teacher—a possible avenue for future work.

## D ADDITIONAL EXPERIMENTS: WIDERESNET

Following the DenseNet-BC experiments in section 5 we repeated them with a different architecture. In this section we focus on a significantly larger WideResNet [Zagoruyko and Komodakis, 2016] model with a depth of 28 and a widening factor of 10. The standard and S2D models were both trained as described in Zagoruyko and Komodakis [2016], with the S2D specific parameters being the same as previously described. The only difference is that teacher predictions were generated using multiplicative Gaussian noise with a fixed standard deviation of 0.10.

The H2D-Gauss model was also trained in a different manner. First, it was initialised from an S2D model trained for 150 epochs. Thereafter it was trained for an additional 80 epochs with a starting learning rate of  $\eta = 2 \times 10^{-3}$  which was reduced by a factor of 4 after 60 epochs. For this section, EnD and H2D-Dir were not investigated.

Table 11 shows test set performance. Unlike previous experiments, S2D was not able to outperform an individual model by more than two standard deviations, in this case achieving around one standard deviation improvement in accuracy. Interestingly, the MC approach has worse accuracy for both the standard and S2D case, however this could be due to the small number of drawn samples ( $M = 5$ ). Furthermore, both Deep ensembles significantly outperform their individual equivalents with the S2D version being slightly better in all measured performance metrics. The notable result in this table is the high performance of H2D-Gauss, able to outperform the Deep ensemble in C100 and achieve near ensemble performance in C100+.

In the OOD detection task we observe that both versions of the MC ensemble struggle to outperform their individual counterparts. There also seems to be a disparity in performance when comparing resize and random cropped LSUN and

<sup>1</sup>Knowledge uncertainty does not necessarily increase with temperature.

Table 11: Test performance ( $\pm 2$  std).

| Dataset           | C100           |                 |                 | C100+          |                 |                 |
|-------------------|----------------|-----------------|-----------------|----------------|-----------------|-----------------|
| Model             | Acc.           | NLL             | %ECE            | Acc.           | NLL             | %ECE            |
| Individual        | 73.9 $\pm 0.5$ | 1.05 $\pm 0.02$ | 5.26 $\pm 0.78$ | 81.1 $\pm 0.3$ | 0.76 $\pm 0.01$ | 5.21 $\pm 0.44$ |
| S2D Individual    | 74.2 $\pm 0.5$ | 1.06 $\pm 0.05$ | 5.48 $\pm 2.25$ | 81.3 $\pm 0.3$ | 0.74 $\pm 0.01$ | 4.24 $\pm 0.74$ |
| MC ensemble       | 73.6 $\pm 0.5$ | 1.05 $\pm 0.03$ | 4.70 $\pm 0.88$ | 81.0 $\pm 0.5$ | 0.74 $\pm 0.01$ | 3.29 $\pm 0.36$ |
| S2D MC ensemble   | 73.8 $\pm 0.4$ | 1.03 $\pm 0.04$ | 2.95 $\pm 1.01$ | 81.0 $\pm 0.3$ | 0.73 $\pm 0.01$ | 1.99 $\pm 0.35$ |
| Deep ensemble     | 77.1           | 0.88            | 5.08            | 83.4           | 0.63            | 2.27            |
| S2D Deep ensemble | 77.9           | 0.86            | 4.52            | 83.6           | 0.63            | 1.84            |
| H2D-Gauss         | 77.4           | 0.95            | 5.19            | 82.8           | 0.71            | 2.45            |

TIM. With random crops, all S2D systems notably outperform their standard counterparts. In this case both S2D Individual and H2D-Gauss were able to outperform the Deep ensemble using any uncertainty metric. In the other case of resizing LSUN and TIM images and in SVHN the detection performance difference is smaller but the S2D Deep ensemble still remains the best model with both H2D-Gauss and Deep ensemble performing similarly.

Table 12: LSUN (resize) OOD detection results. **Best** in column and **best** overall.

| Model             | OOD %AUROC     |                |                |                | OOD %AUPR      |                |                |                |
|-------------------|----------------|----------------|----------------|----------------|----------------|----------------|----------------|----------------|
|                   | Conf.          | TU             | DU             | KU             | Conf.          | TU             | DU             | KU             |
| Individual        | 76.3 $\pm 0.5$ | 76.7 $\pm 0.6$ |                |                | 70.7 $\pm 0.8$ | 71.1 $\pm 0.9$ |                |                |
| S2D Individual    | 76.0 $\pm 1.1$ | 76.5 $\pm 1.5$ | 76.7 $\pm 1.4$ | 75.7 $\pm 1.6$ | 71.4 $\pm 1.8$ | 72.0 $\pm 2.7$ | 72.8 $\pm 3.7$ | 69.7 $\pm 2.0$ |
| MC ensemble       | 75.8 $\pm 0.6$ | 76.2 $\pm 0.7$ | 76.4 $\pm 0.7$ | 65.2 $\pm 1.7$ | 70.3 $\pm 1.0$ | 70.5 $\pm 1.1$ | 70.8 $\pm 1.2$ | 56.2 $\pm 1.5$ |
| S2D MC ensemble   | 75.7 $\pm 1.0$ | 76.4 $\pm 1.7$ | 77.0 $\pm 1.6$ | 75.2 $\pm 2.1$ | 71.0 $\pm 1.6$ | 71.6 $\pm 2.7$ | 73.1 $\pm 3.8$ | 69.6 $\pm 2.6$ |
| Deep ensemble     | 77.6           | 78.0           | 78.4           | 68.0           | 72.3           | 72.6           | 73.1           | 58.8           |
| S2D Deep ensemble | <b>77.7</b>    | <b>78.5</b>    | <b>79.3</b>    | 76.8           | <b>73.2</b>    | <b>74.1</b>    | <b>75.9</b>    | 71.3           |
| H2D-Gauss         | 77.1           | 77.2           | 77.8           | <b>77.5</b>    | 72.0           | 71.8           | 71.9           | <b>72.3</b>    |

Table 13: LSUN (random crop) OOD detection results. **Best** in column and **best** overall.

|                   |                |                |                |                       |                |                |                |                       |
|-------------------|----------------|----------------|----------------|-----------------------|----------------|----------------|----------------|-----------------------|
| Individual        | 72.4 $\pm 5.0$ | 73.9 $\pm 5.4$ |                |                       | 67.0 $\pm 2.9$ | 68.7 $\pm 3.1$ |                |                       |
| S2D Individual    | 75.8 $\pm 3.4$ | 77.6 $\pm 4.3$ | 77.9 $\pm 4.7$ | <b>76.5</b> $\pm 4.6$ | 70.5 $\pm 3.9$ | 72.6 $\pm 4.9$ | 74.4 $\pm 4.7$ | <b>71.4</b> $\pm 5.5$ |
| MC ensemble       | 68.9 $\pm 5.6$ | 70.3 $\pm 6.0$ | 70.9 $\pm 6.2$ | 50.8 $\pm 3.7$        | 64.0 $\pm 3.0$ | 65.2 $\pm 3.5$ | 66.1 $\pm 3.6$ | 45.7 $\pm 1.5$        |
| S2D MC ensemble   | 72.7 $\pm 3.2$ | 74.5 $\pm 4.1$ | 75.9 $\pm 4.3$ | 72.0 $\pm 4.4$        | 67.7 $\pm 3.3$ | 69.7 $\pm 4.6$ | 73.4 $\pm 4.4$ | 65.7 $\pm 5.0$        |
| Deep ensemble     | 72.1           | 74.2           | 75.2           | 60.6                  | 67.2           | 69.2           | 70.5           | 51.6                  |
| S2D Deep ensemble | 75.5           | <b>78.4</b>    | <b>80.0</b>    | 75.4                  | <b>70.7</b>    | <b>73.9</b>    | <b>77.2</b>    | 69.0                  |
| H2D-Gauss         | <b>76.0</b>    | 77.6           | 77.8           | 76.4                  | 69.6           | 71.5           | 74.1           | 70.9                  |

Table 14: SVHN OOD detection results. **Best** in column and **best** overall.

|                   |                |                |                |                |                |                |                |                |
|-------------------|----------------|----------------|----------------|----------------|----------------|----------------|----------------|----------------|
| Individual        | 80.1 $\pm 4.6$ | 81.6 $\pm 4.4$ |                |                | 88.3 $\pm 2.4$ | 89.0 $\pm 2.3$ |                |                |
| S2D Individual    | 80.1 $\pm 4.4$ | 81.6 $\pm 4.4$ | 81.9 $\pm 4.8$ | 81.4 $\pm 5.4$ | 88.6 $\pm 2.3$ | 89.2 $\pm 2.5$ | 90.1 $\pm 2.5$ | 87.8 $\pm 4.1$ |
| MC ensemble       | 77.6 $\pm 4.9$ | 79.1 $\pm 4.5$ | 79.7 $\pm 4.5$ | 56.6 $\pm 2.5$ | 86.9 $\pm 2.3$ | 87.5 $\pm 2.2$ | 88.0 $\pm 2.2$ | 70.2 $\pm 1.2$ |
| S2D MC ensemble   | 77.3 $\pm 4.7$ | 79.0 $\pm 4.8$ | 80.1 $\pm 4.6$ | 77.3 $\pm 5.6$ | 87.1 $\pm 2.5$ | 87.7 $\pm 2.7$ | 89.6 $\pm 2.5$ | 85.7 $\pm 3.9$ |
| Deep ensemble     | <b>81.5</b>    | 83.4           | 84.0           | 68.3           | 89.2           | 89.9           | 90.4           | 77.9           |
| S2D Deep ensemble | 81.5           | <b>83.7</b>    | <b>84.6</b>    | <b>81.8</b>    | <b>89.6</b>    | <b>90.5</b>    | <b>92.0</b>    | <b>88.1</b>    |
| H2D-Gauss         | 81.5           | 82.1           | 83.2           | 80.6           | 88.6           | 88.4           | 90.5           | 87.1           |

Table 15: TIM (resize) OOD detection results. **Best** in column and **best** overall.

|                   |                |                |                |                |                |                |                |                |
|-------------------|----------------|----------------|----------------|----------------|----------------|----------------|----------------|----------------|
| Individual        | 79.7 $\pm 0.4$ | 80.5 $\pm 0.4$ |                |                | 75.9 $\pm 0.5$ | 76.9 $\pm 0.5$ |                |                |
| S2D Individual    | 79.2 $\pm 0.6$ | 80.0 $\pm 0.5$ | 80.2 $\pm 0.3$ | 80.2 $\pm 0.4$ | 76.0 $\pm 1.0$ | 77.1 $\pm 1.0$ | 77.1 $\pm 0.7$ | 76.7 $\pm 0.7$ |
| MC ensemble       | 79.8 $\pm 0.4$ | 80.6 $\pm 0.3$ | 80.7 $\pm 0.4$ | 68.3 $\pm 1.7$ | 76.1 $\pm 0.7$ | 77.0 $\pm 0.6$ | 77.1 $\pm 0.6$ | 59.5 $\pm 1.6$ |
| S2D MC ensemble   | 79.4 $\pm 0.6$ | 80.3 $\pm 0.7$ | 80.2 $\pm 1.0$ | 80.1 $\pm 0.7$ | 75.9 $\pm 0.9$ | 77.1 $\pm 1.0$ | 77.2 $\pm 1.1$ | 76.8 $\pm 0.6$ |
| Deep ensemble     | 81.8           | 82.7           | 82.7           | 72.5           | 78.4           | 79.3           | 79.2           | 64.1           |
| S2D Deep ensemble | <b>81.9</b>    | <b>82.9</b>    | <b>82.9</b>    | <b>82.5</b>    | <b>79.0</b>    | <b>80.2</b>    | <b>80.2</b>    | <b>79.6</b>    |
| H2D-Gauss         | 80.9           | 81.4           | 81.4           | 81.5           | 77.4           | 79.0           | 78.9           | 78.0           |

Table 16: TIM (random crop) OOD detection results. **Best** in column and **best** overall.

|                   |                |                |                |                |                |                |                |                |
|-------------------|----------------|----------------|----------------|----------------|----------------|----------------|----------------|----------------|
| Individual        | 71.2 $\pm 3.8$ | 72.8 $\pm 4.0$ |                |                | 68.9 $\pm 3.5$ | 70.9 $\pm 4.0$ |                |                |
| S2D Individual    | 73.1 $\pm 3.0$ | 74.9 $\pm 3.6$ | 76.3 $\pm 3.9$ | 75.9 $\pm 3.4$ | 71.4 $\pm 1.7$ | 73.7 $\pm 2.2$ | 74.5 $\pm 2.4$ | 73.4 $\pm 2.4$ |
| MC ensemble       | 70.1 $\pm 3.5$ | 71.8 $\pm 3.7$ | 72.1 $\pm 3.7$ | 57.1 $\pm 1.0$ | 68.1 $\pm 3.6$ | 70.2 $\pm 3.9$ | 70.6 $\pm 3.9$ | 50.4 $\pm 1.1$ |
| S2D MC ensemble   | 71.7 $\pm 2.7$ | 73.8 $\pm 3.2$ | 74.2 $\pm 3.3$ | 73.7 $\pm 3.1$ | 70.0 $\pm 1.5$ | 72.6 $\pm 1.7$ | 73.3 $\pm 1.8$ | 71.9 $\pm 1.6$ |
| Deep ensemble     | 72.2           | 74.5           | 74.7           | 65.2           | 70.3           | 72.9           | 73.0           | 58.1           |
| S2D Deep ensemble | 74.3           | <b>77.0</b>    | 77.3           | <b>77.1</b>    | <b>72.6</b>    | <b>75.9</b>    | <b>76.2</b>    | <b>75.5</b>    |
| H2D-Gauss         | <b>75.2</b>    | 76.9           | <b>77.3</b>    | 76.4           | 72.0           | 74.0           | 74.5           | 73.5           |
